# Supplementary material for: Coupling catalytic bed fluidization with impeller rotation for improved hydrodynamic characterization of Berty reactors
Source: Royal Society of Chemistry journal article supplement (doi:10.1039/d4re00074a), 2024-01-01
Supplement: d4re00074a1.pdf [file d4re00074a1.pdf]

1 **Coupling catalytic bed fluidization with impeller rotation for**  
2 **improved hydrodynamic characterization of Berty reactors**

3 Mengmeng Cui<sup>a</sup>, Shekhar R. Kulkarni<sup>a</sup>, Yacoub-Yousef Abu-Naaj<sup>b</sup>, Stefan Wagner<sup>b</sup>, Claudia Berger-Karin<sup>b</sup>, Jan  
4 Lennart Weber<sup>b</sup>, Anton Nagy<sup>b</sup>, Pedro Castaño<sup>a,c,\*</sup>

5 <sup>a</sup> *Multiscale Reaction Engineering, KAUST Catalysis Center (KCC), King Abdullah University of Science and*  
6 *Technology (KAUST), Thuwal, 23955-6900, Saudi Arabia*

7 <sup>b</sup> *ILS – Integrated Lab Solutions GmbH, 12489 Berlin, Germany*

8 <sup>c</sup> *Chemical Engineering Program, Physical Science and Engineering (PSE) Division, King Abdullah University*  
9 *of Science and Technology*

10 \* Corresponding authors: [pedro.castano@kaust.edu.sa](mailto:pedro.castano@kaust.edu.sa)

11

12

13

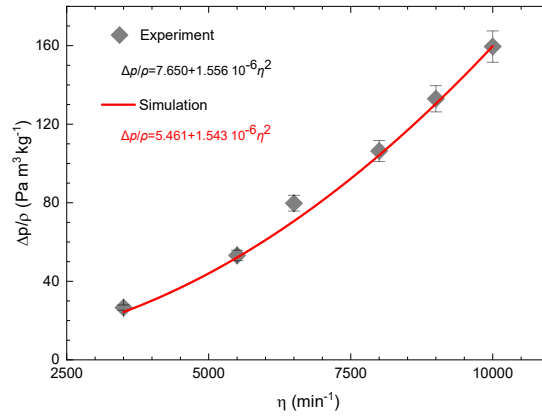

14

15 Figure S1. Compared impeller relationships of the simulation and experiment.<sup>1</sup>

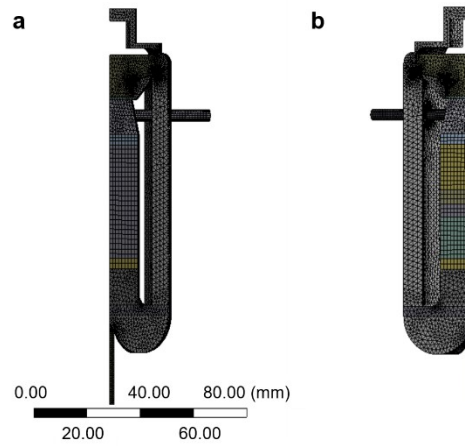

16

17 Figure S2. (a) A mesh model assuming a homogeneous porous zone for the bed; (b) a mesh  
 18 model that considers the actual bed expansion with settings for different layers of porosities.

19

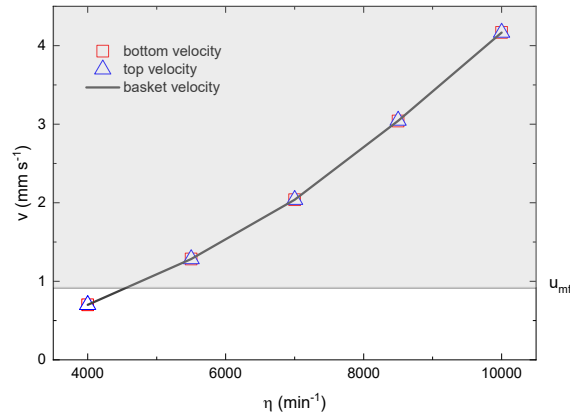

20

21 Figure S3. The averaged velocity at the bottom and top surfaces, as well as throughout the  
 22 entire volume of the bed, measured under different rotation rates, as detailed in the simulation  
 23 conditions presented in Tables 1 and 2.

24

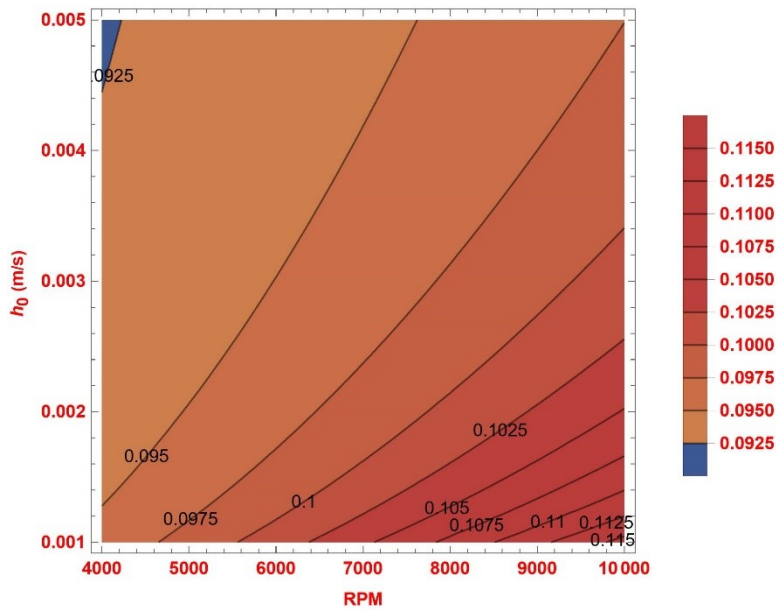

25

26 Figure S4. Variation of superficial gas velocities in the catalytic bed as a function of impeller  
 27 rotation rates for different solid loadings and bed porosities of 0.3.

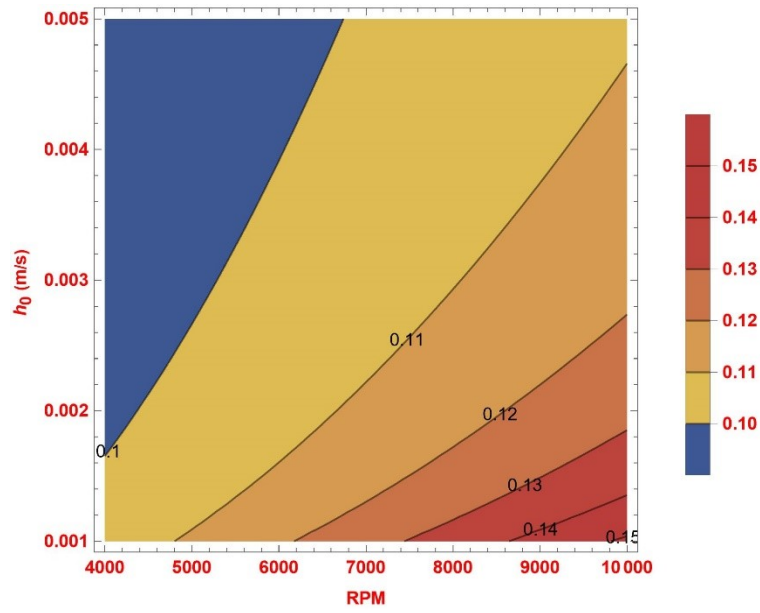

28

29 Figure S5. Variation of superficial gas velocities in the catalytic bed as a function of impeller  
 30 rotation rates for different solid loadings and bed porosities of 0.4.

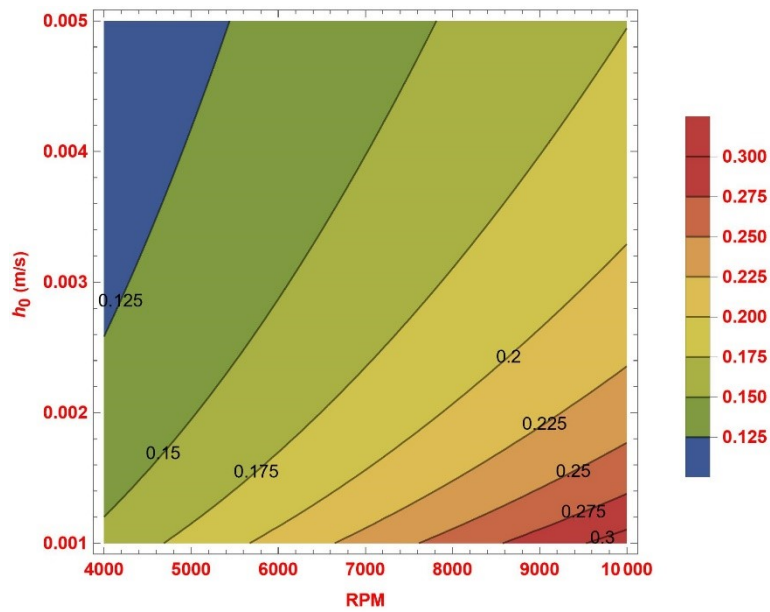

31

32 Figure S6. Variation of superficial gas velocities in the catalytic bed as a function of impeller  
 33 rotation rates for different solid loadings and bed porosities of 0.5.

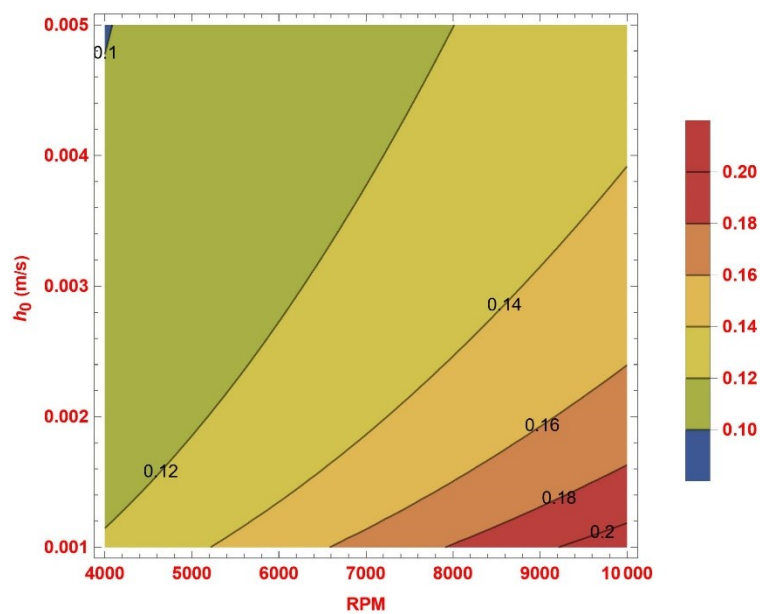

34

35 Figure S7. Variation of superficial gas velocities in the catalytic bed as a function of impeller  
 36 rotation rates for different solid loadings and bed porosities of 0.6.

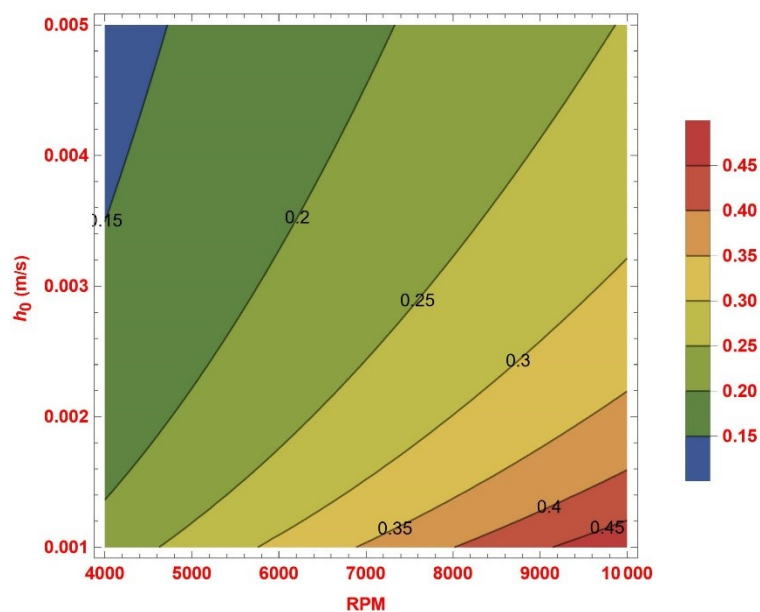

37

38 Figure S8. Variation of superficial gas velocities in the catalytic bed as a function of impeller  
 39 rotation rates for different solid loadings and bed porosities of 0.7.

40

#### 41 References

42 1 M. Cui, S. R. Kulkarni, S. Wagner, C. Berger-Karin, A. Nagy and P. Castaño, ACS  
 43 Eng. Au, 2022, 2, 103–117.
